# Supplementary material for: Changes in Meibum Lipid Composition With Ocular Demodex Infestation
Source: PubMed Central journal article supplement — Transl Vis Sci Technol. 2021 Dec 7;10(14):6. doi: 10.1167/tvst.10.14.6 (PMC8662575; doi:10.1167/tvst.10.14.6), 2021-12-07
Supplement: tvst-10-14-6_s001.pdf [file tvst-10-14-6_s001.pdf]

## Supplementary material

Table S1. Ocular surface characteristics of the four groups

|                       | D-M-<br>(a) | D+M-<br>(b) | D-M+<br>(c) | D+M+<br>(d) | P        |          |          |          |
|-----------------------|-------------|-------------|-------------|-------------|----------|----------|----------|----------|
|                       |             |             |             |             | (a)vs(b) | (a)vs(c) | (b)vs(d) | (c)vs(d) |
| Demodex count         | 0.2±0.4     | 6.5±2.6     | 0.4±0.8     | 8.9±1.9     | <0.001*  | 0.512    | 0.004*   | <0.001*  |
| OSDI                  | 6.3±3.9     | 12.6±4.5    | 19.7±9.1    | 20.6±9.4    | 0.006*   | 0.001*   | 0.037    | 0.868    |
| ST (mm/5min)          | 14.5±5.6    | 12.8±5.5    | 12.4±6.0    | 10.4±4.7    | 0.467    | 0.491    | 0.381    | 0.449    |
| TBUT (seconds)        | 6.8±2.3     | 6.9±2.6     | 4.0±2.8     | 3.8±1.3     | 0.935    | 0.012    | 0.006    | 0.559    |
| Meibum quality        | 0.3±0.5     | 0.4±0.5     | 1.6±0.7     | 2.1±0.7     | >0.999   | 0.001*   | 0.001*   | 0.198    |
| Meibum expressibility | 0.2±0.4     | 0.3±0.5     | 0.9±0.6     | 1.1±0.6     | >0.999   | 0.019    | 0.004*   | 0.697    |

OSDI, ocular surface disease index; ST, schirmer's test; TBUT, tear break-up time.

\* P < 0.05
